# Supplementary material
Source: PubMed Central journal article supplement (PMC5826829)

## Supplementary figure legends

**Figure S1. RT-PCR analysis of EVs transfected with miR-335-5p.** A comparison is made between EVs transfected with miR mimics vs. control (PBS with no EVs).

**Figure S2. Verification of Cre expression.** PCR for Cre mRNA was performed. LX2 cells (Cre negative, control cells) do not show any expression of Cre. Similarly, the EVs obtained from these cells, as well as the supernatant (Sup in the figure) that is left from conditioned media (CM) after EV extraction do not demonstrate any Cre. LX2 cells that express Cre demonstrate the Cre mRNA as shown. In addition, EVs isolated from these cells demonstrate Cre, but not the Sup (CM depleted of EVs). H<sub>2</sub>O is included as another negative control.

**Figure S3. HCC cells transfected with PMSC-Lox-ds Red-Lox-eGFP-puro-WRPE.** As expected, these cells demonstrate fluorescence in the red, but not the green channel.

**Figure S4. Exosomal transfer from fibroblasts cells to HCC cells *in vitro*.** LX2-Cre cells were added to MHCC97L-Loxp-dsRed-Loxp cells (red) for 1 week. We noted the switch in color from red to green occurring in select cancer cells. These findings argue that Cre was shuttled from LX2 cells to HCC cells. Scale bars represent 50  $\mu$ m.

## **Supplementary materials and methods**

### **HCC – LX2 co-culture**

Same numbers of HCC cells stably infected with pCDH-EF1-MCS-IRES-GFP lentivirus and LX2 cells ( $5 \times 10^5$ ) were seeded in a T75 flask and were co-cultured for 14 days. After co-culturing, HCC cells and LX2 cells were separated by FACS sorting according based on GFP positivity.

### **Infection of LX2 cells with a Cre expressing lentivirus**

Puro.Cre empty vector (Addgene plasmid #17408) ( $7.5 \mu\text{g}/10 \text{ cm plate}$ ), PxPAX2 ( $6 \mu\text{g}/10 \text{ cm plate}$ ) (Addgene), and pMD2.G vector ( $2 \mu\text{g}/10 \text{ cm plate}$ ) were transfected into 2, 100 mm culture dishes of 293T cells, using X-tremeGENE HP DNA Transfection reagent (Roche). Seventy-two hours after transfection, supernatant were collected. LX2 cells were plated in a T75 flask in 10ml of DMEM media containing 10% FBS and 1% Pen-Strep. Cells were grown in a  $37^\circ\text{C}$  incubator at 5%  $\text{CO}_2$  to 50% confluence. LX2 cells were then transduced with virus supernatant supplemented with polybrene. After 72 hours, LX2 cells were started on treatment with puromycin ( $0.5 \mu\text{g}/\text{ml}$ ) for 2 weeks.

### **miR transfection**

The miR mimics used in this study were as follows: hsa-miR-335-5p, mirVana® miRNA mimic (Life Technologies Corporation, ThermoFisher, USA), Mature miRNA Sequence:UCAAGAGCAAUAACGAAAAAUGU; mir Vana miRNA mimic negative control (Life Technologies Corporation, ThermoFisher, USA). MiR-335-5p mimic or miRNA Negative Control (NSM) were transfected into HCC cells or LX2 cells using Lipofectamine RNAiMAX Reagent (ThermoFisher, USA) according to the manufacturer's instructions.

### **Transwell invasion assay of HCC cells**

HepG2, MHCC97H, MHCC97L and Huh7 cells were first transfected with miR-335-5p mimic or NSM for 48h. Then, cells were washed three times with PBS. A number of  $5 \times 10^4$  cells were suspended in  $100 \mu\text{l}$  of serum-free medium and seeded onto the upper chamber of the Transwell ( $8\text{-}\mu\text{m}$  pore size,  $6.5\text{-mm}$  diameter; Corning, Corning, NY, USA) in a 24-well plate. Medium with 10% FBS ( $200 \mu\text{l}$ ) as chemoattractant was placed in the lower chambers. After 24 h of incubation, non-invading cells in the Matrigel were removed by wiping with a cotton swab. Invading cells at the transwell membrane were stained with crystal violet (Thermo Fisher Scientific). Cells from five random fields were counted at  $\times 10$  original Magnification with Image J software. The percentage of invasion was calculated as follows: Count and average the total number of cells in each of the random fields within an insert, divide this number by the area of the microscope viewing fields and then multiply this number by the entire area of the transwell insert, then the percent invasion can be calculated by dividing this number by the number of cells seeded. We multiplied this value by 100 to get a percent.

### **Proliferation of HCC cells in transwell co-culture conditions**

LX2 cells transfected with miR-335-5p mimic or NSM were cultured for 2 days by themselves, then washed and trypsinised, centrifuged and washed 3 times with PBS. LX2 cells ( $1.25 \times 10^4$ ) were seeded into the lower well of 12 well with  $0.4 \mu\text{m}$  transwell co-culture system (cat# 3460, Corning, Tewksbury, MA). For the upper chamber,  $1 \times 10^5$  HepG2, MHCC97H, MHCC97L and Huh7 cells were seeded at the same time after trypsinization and counting as above. After 4 days, the four kinds of HCC cell number were determined by counting (Countess, Invitrogen).

### **Transwell invasion assay of HCC cells lines co-cultured with LX2**

LX2 cells were treated with miR-335-5p mimic or NSM as described above. After incubation for 48 h,  $3 \times 10^4$  LX2-335 or LX2-NSM and  $3 \times 10^4$  HepG2, MHCC97H, MHCC97L and Huh7 cells

were mixed together for co-culturing for 48h. Next, co-cultured cells were trypsinized and plated in serum-free medium onto the upper chambers of the Transwell (8- $\mu$ m pore size, 6.5-mm diameter; Corning, Corning, NY, USA) in 24 well plates. Medium with 10% FBS (200  $\mu$ l) was placed in the lower chambers as chemoattractant. After 24 h of incubation, non-invading cells in the Matrigel were removed by wiping with a cotton swab. Invading cells at the transwell membrane were stained with crystal violet (Thermo Fisher Scientific). The invasion index was calculated as above.

### **Scratch migration assay of HCC cells lines after co-culture with LX2**

LX2 cells were treated with miR-335-5p mimic or NSM. After incubation for 48 h, the 0.4  $\mu$ m transwell co-culture membrane were added in the same plate, and the HepG2, MHCC97H, MHCC97L and Huh7 cells (100,000 cells/well) were plated on the membrane. After incubation for 48 h, the HCC cells were removed by trypsinisation, counted and plated at  $2 \times 10^6$  cells per well with serum-free medium in new 24-well dishes. Cells were incubated overnight yielding confluent monolayers for wounding. Wounds were made using a pipette tip (200ul) and photographs taken immediately (time zero) and 24 or 48 h after wounding. The distance migrated by the cell monolayer to close the wounded area during this time period was measured.

### **Spheroid generation and invasion measurement**

We generated MHCC97H cell spheroids by using the hanging drop method<sup>14</sup>. Briefly, we re-suspended MHCC97H for a concentration of  $5 \times 10^4$  /ml. Next, we used a multi-channel pipettor to transfer 20  $\mu$ l droplets of cell suspension to the inner surface of the lid of a 100 mm dish. We then quickly inverted the lid and placed over the dish which contained PBS (to prevent cell medium evaporation). The hanging drop cultures were incubated at 37 °C for 72 hr to generate spheroids. Next, we collected the spheroids, mixed them with 100  $\mu$ l of basement membrane material and 100  $\mu$ l of cold (4 °C) type I collagen. We then pipetted 40  $\mu$ l drops of the viscous mixture into the centers of wells in a 24-well plate. Plates were then placed at 37 °C in an incubator and left undisturbed for 30 min. Next, we slowly submerged these 3D cultures in 1 ml of cell culture media. Exosomes were transfected with miR-335-5p mimics or miR-NSM as above. Then, 5 $\mu$ g of exosomes-miR-335 or exosome-NSM per well were added in the medium on top of spheroid. Pictures were taken at time 0h, 24h, 48h, and 72h. The invasion areas were measured with Image J software. The invasion index was calculated by dividing the invasion area by the area of the 24h spheroid. \*  $p < 0.05$  comparing with other group.

**Figure S1**

**miR-335**

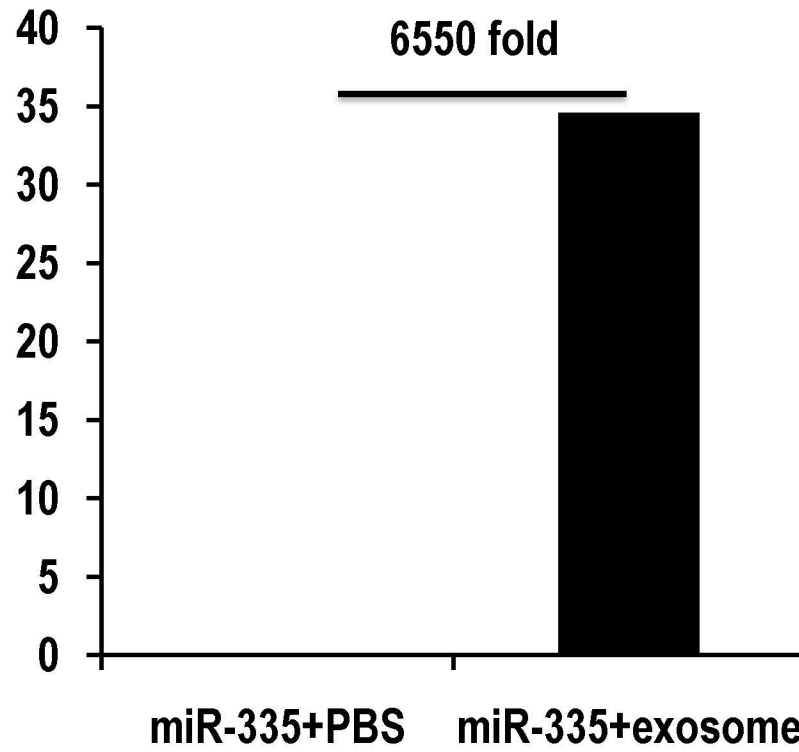

**Figure S2**

| 1kb | <u>Cre<sup>-</sup> cells</u> |           |     | <u>Cre<sup>+</sup> cells</u> |           |     | H <sub>2</sub> O |
|-----|------------------------------|-----------|-----|------------------------------|-----------|-----|------------------|
|     | <u>Cells</u>                 | <u>CM</u> |     | <u>Cells</u>                 | <u>CM</u> |     |                  |
|     | -                            | Sup       | EVs | -                            | Sup       | EVs |                  |

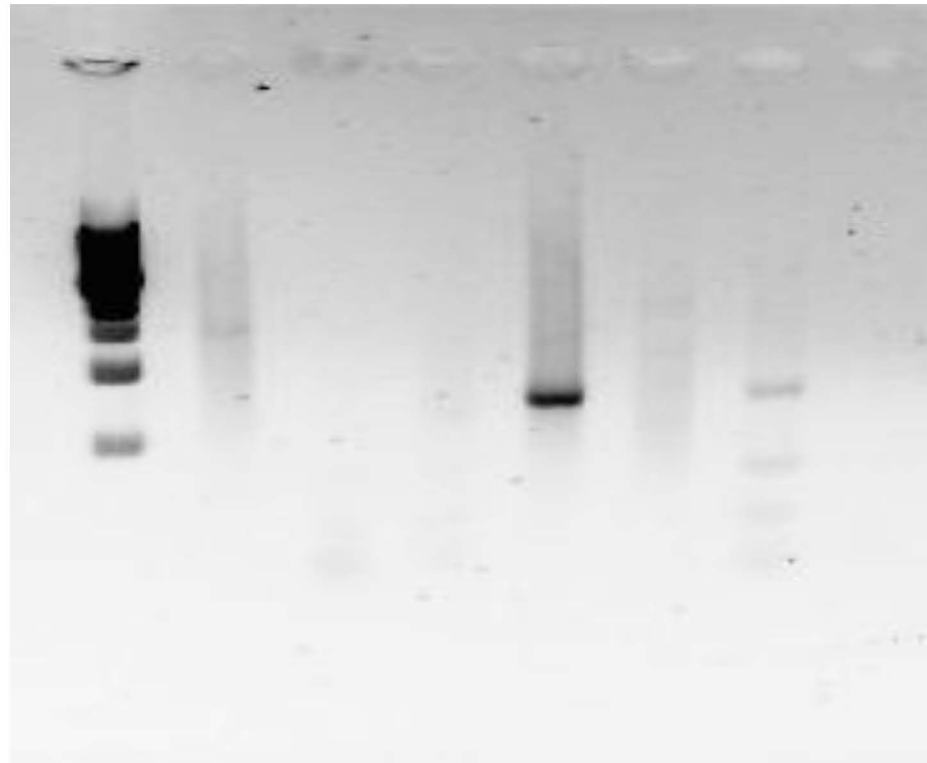

**Figure S3**

**White channel**

**Red channel**

**Green channel**

**MHCC97L-  
Lox-  
dsRed-Lox**

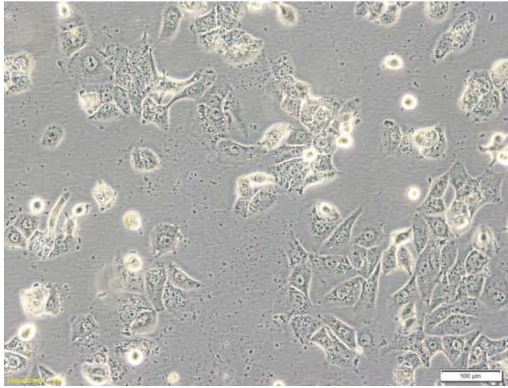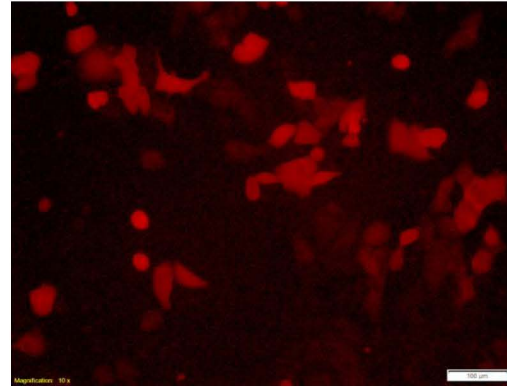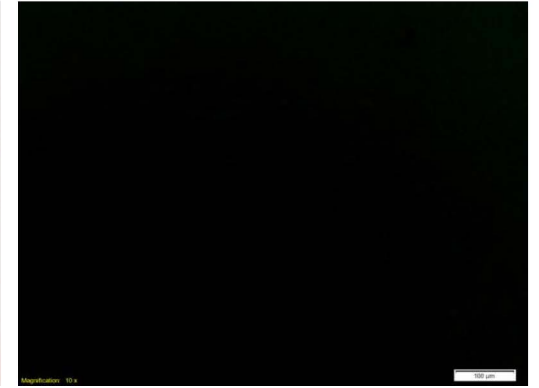

**MHCC97H-  
Lox-dsRed-  
Lox**

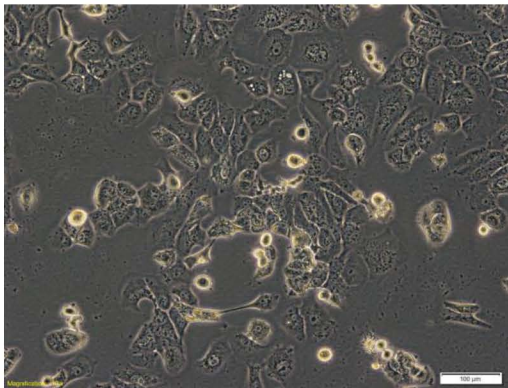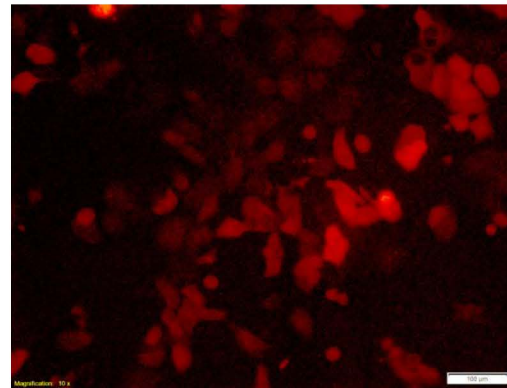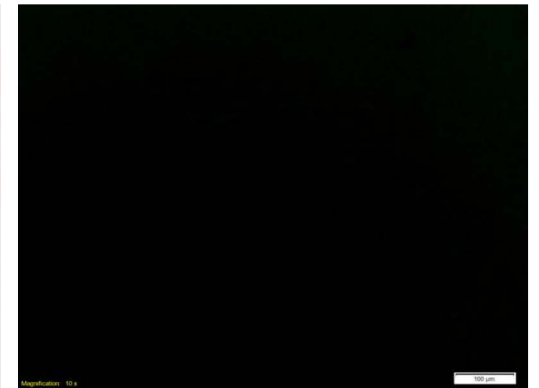

**HepG2-Lox-  
dsRed-Lox**

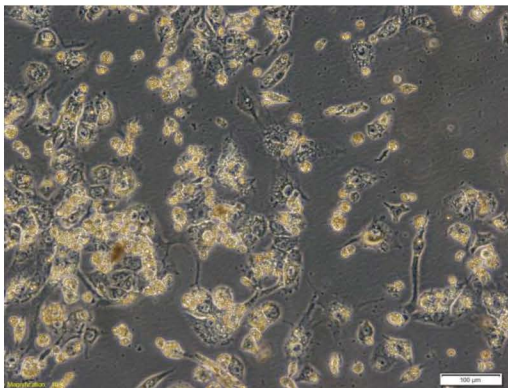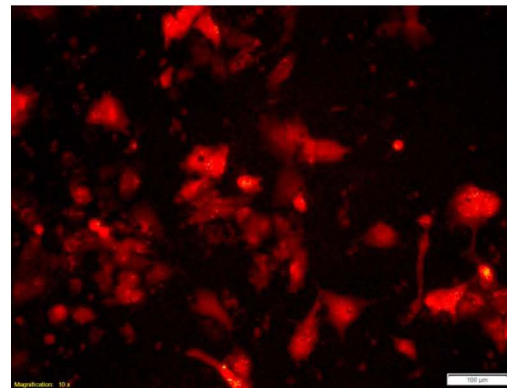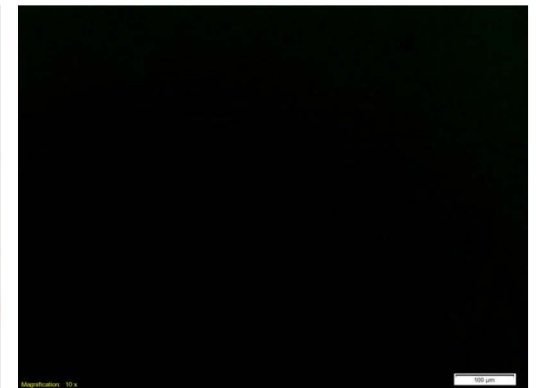

Figure S4

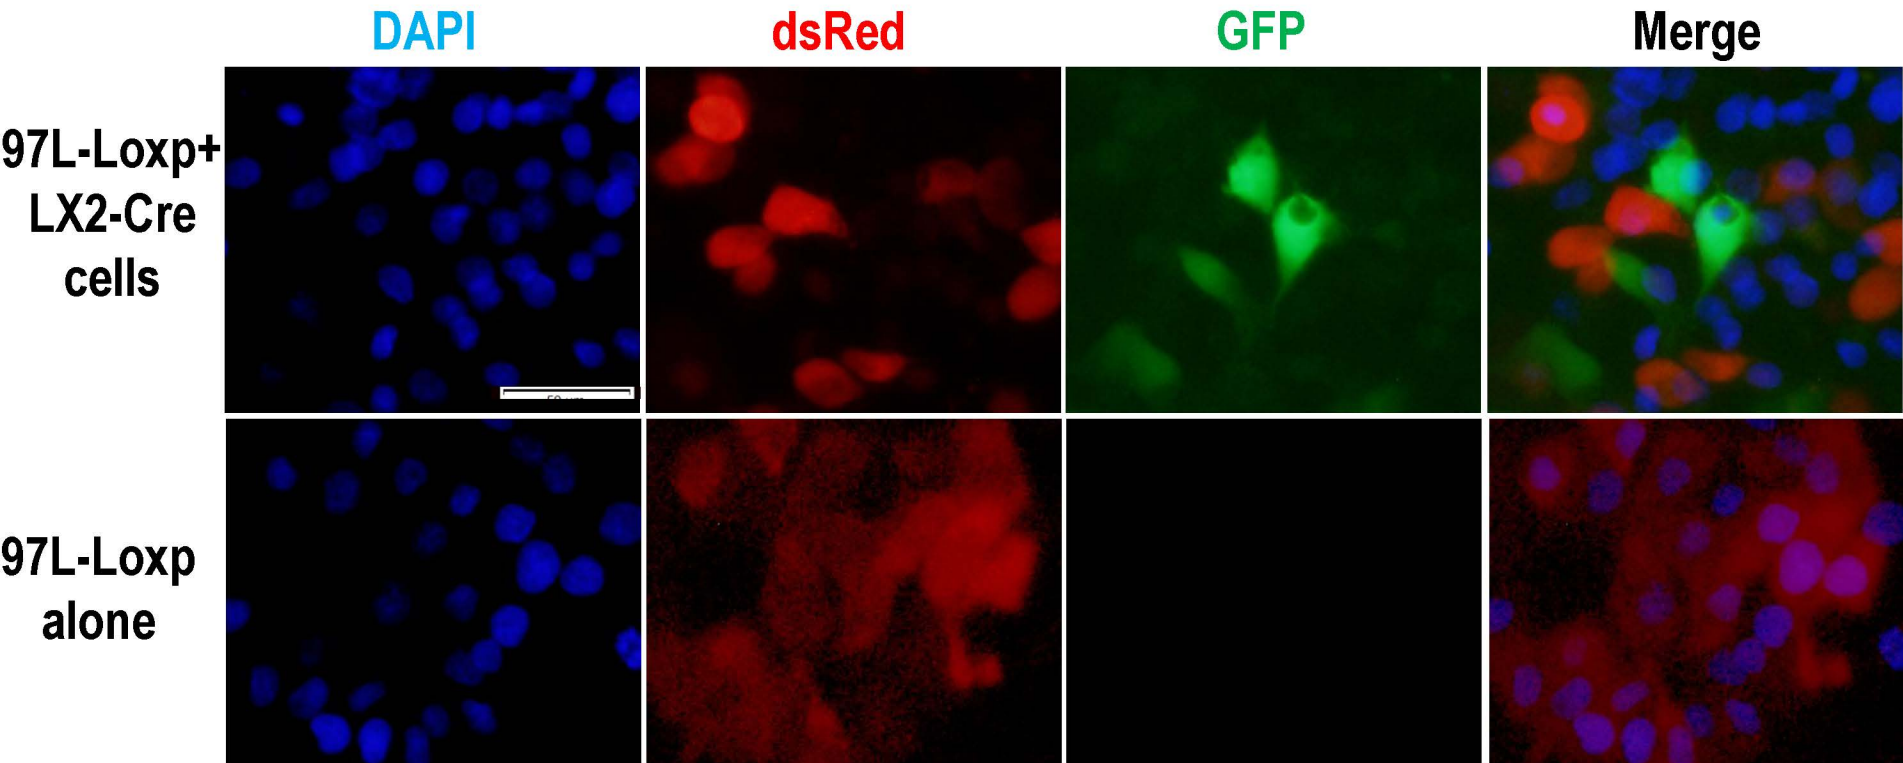

Supplement: NIHMS913347-supplement-Supp_info.pdf [file NIHMS913347-supplement-Supp_info.pdf]
